# Supplementary material
Source: PubMed Central journal article supplement (PMC3581971)
Supplement: 1218746110_sapp.pdf [file 1218746110_sapp.pdf]

## Supplementary Information

**Figure S1.** First molar (M1) eruption over 3 months in the eastern chimpanzee female infant Gola (ages in years).

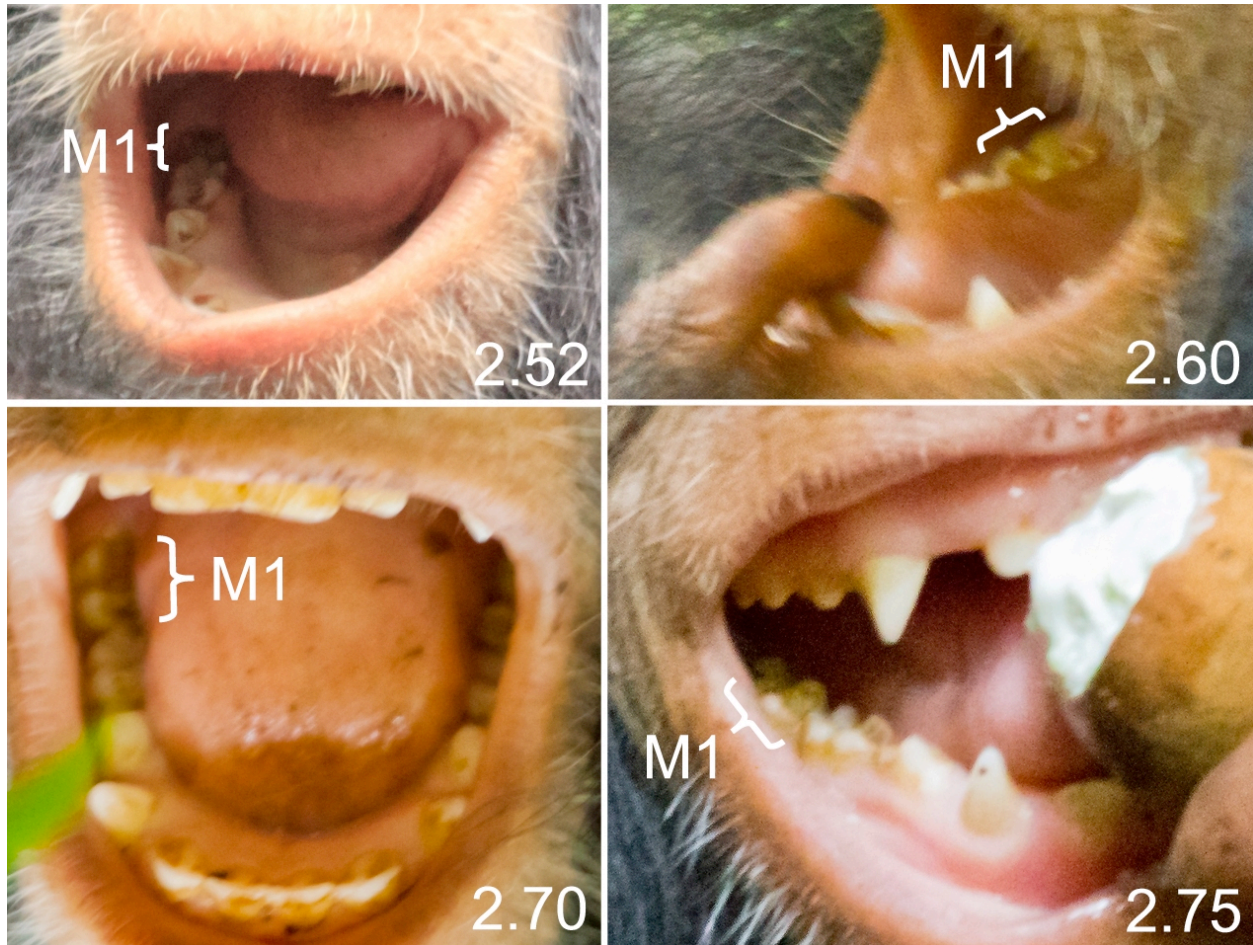

Gola, whose birth was known to the day, was first photographed at 2.52 years of age (upper left) with the mesial cusps of the right M1 above the gumline (indicated with white brackets). Successive photos illustrate the progression of this tooth, with distal cusps appearing at 2.60 years of age, and the tooth in occlusion by 2.75 years of age. This period is remarkably similar to the reported duration of M1 eruption in a single captive chimpanzee (1). Gola spent 4.9% of her time nursing during this period, and 36% of her time feeding on solid food (n = 34 hours of observation time in view).

**Figure S2.** Comparison of subadult males Wallace (left) and Quiver (right).

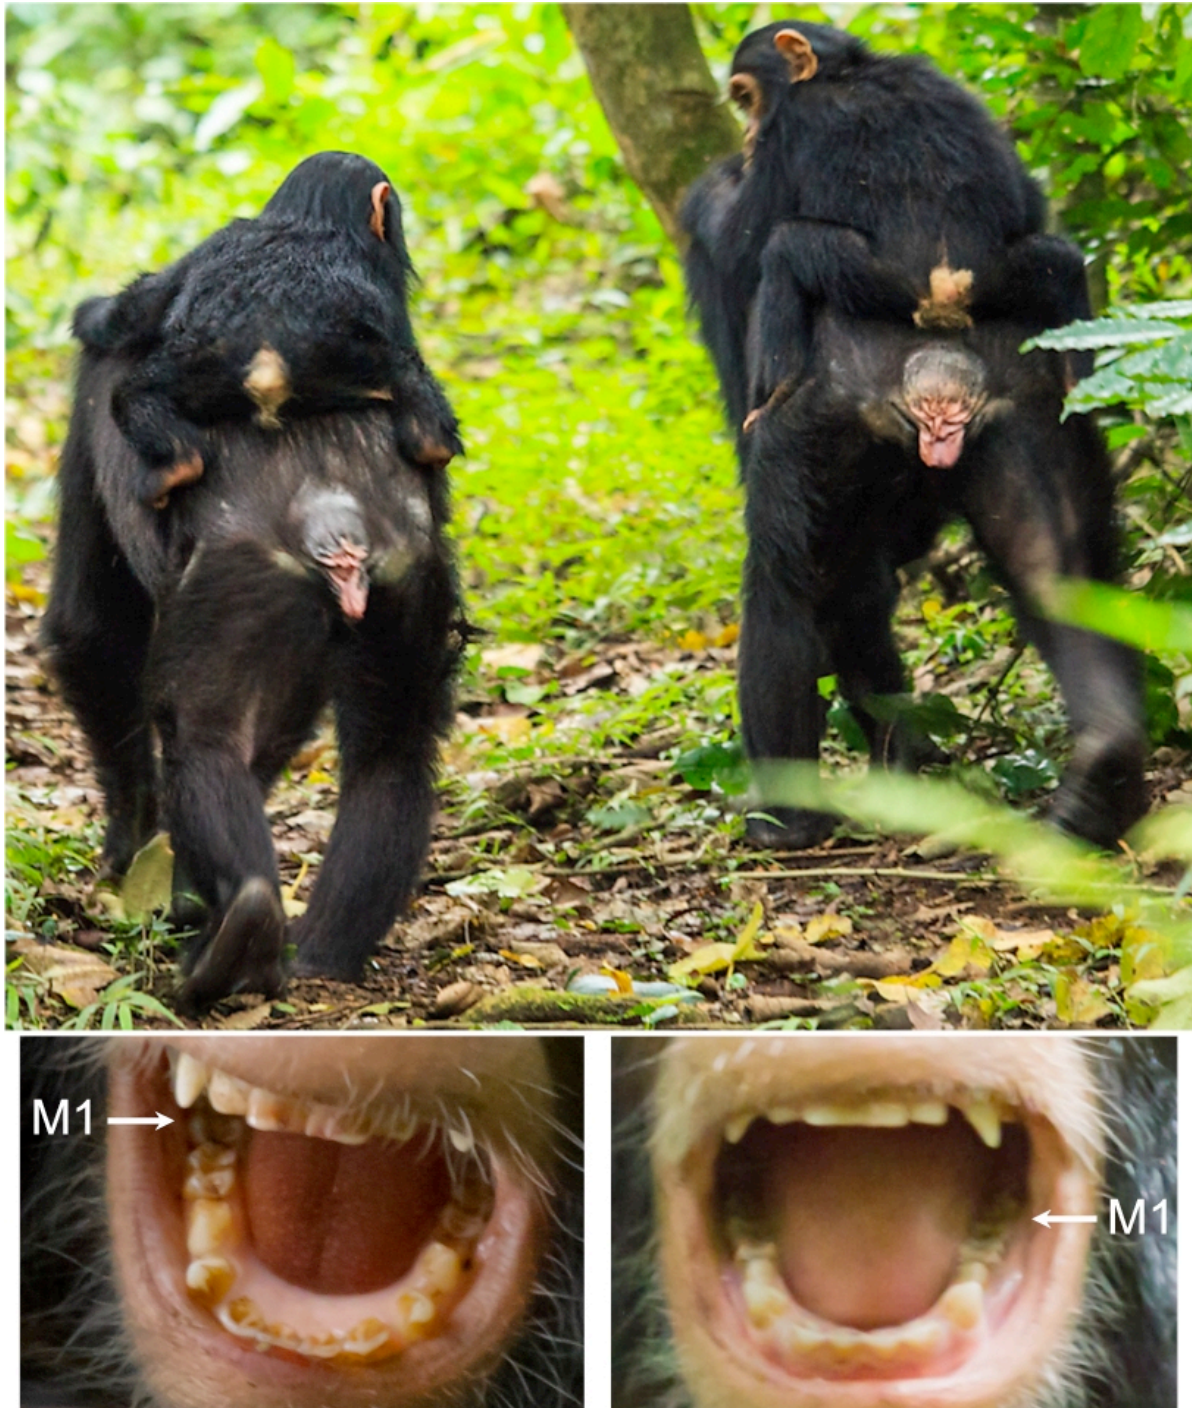

Qualitative assessments of body size by experienced field assistants would classify Quiver as approximately one year older than Wallace, yet they were born within the same month and show similar degrees of M1 emergence. The dental photographs were taken when Wallace (left) was 3.1 years of age and Quiver (right) was 3.3 years of age, and the image above was taken when they were 3.1 years of age.

**Figure S3.** Dietary composition of subadult chimpanzees by age, with average adult values for ripe fruit and fibrous food consumption illustrated by blue and red bars, respectively.

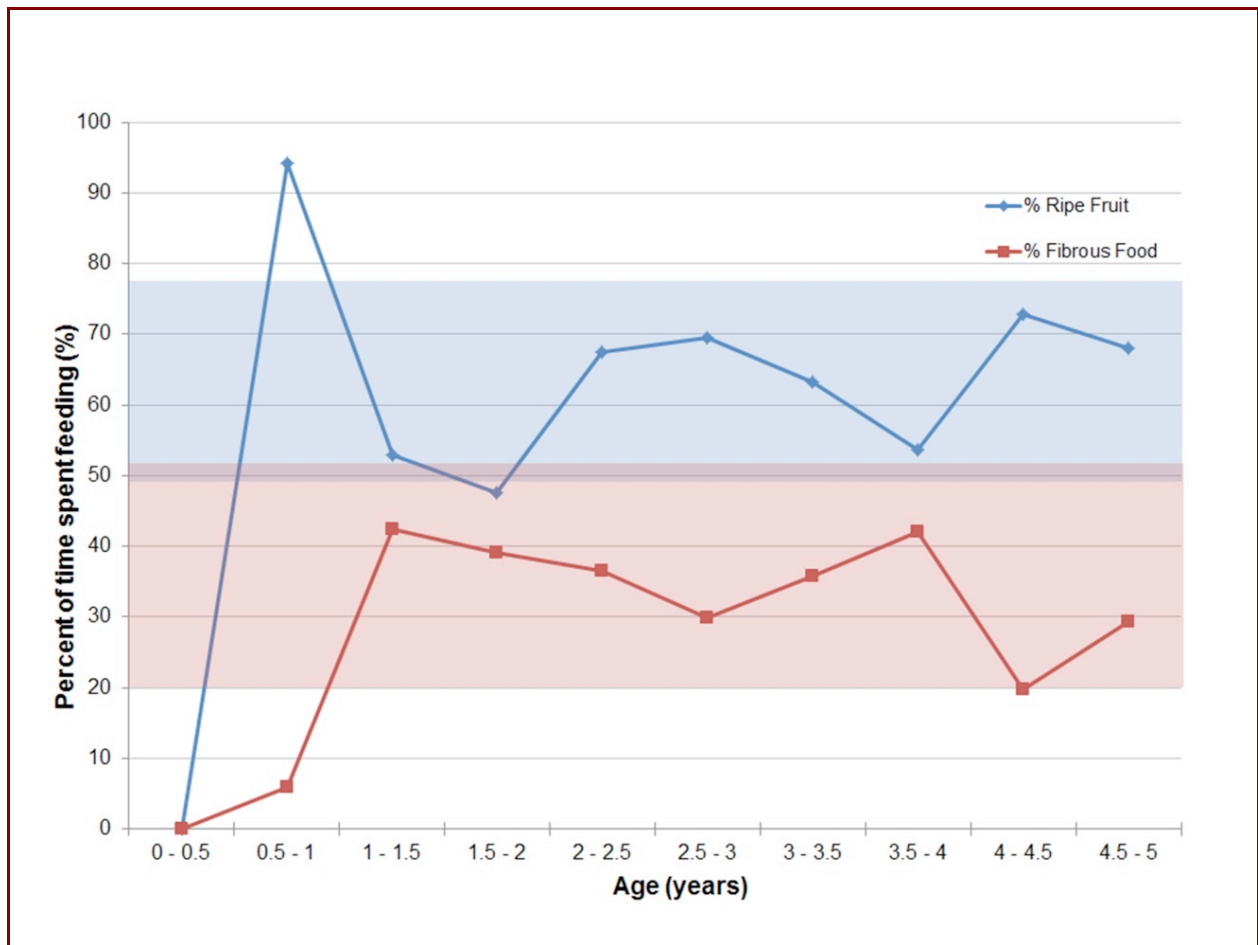

Since the adult ranges were calculated by averaging values for each month, the range presented here is due to differences in food availability over the course of the year.

**Figure S4.** Wenka, a subadult female first photographed at age 4.3 with upper and lower molars in full occlusion.

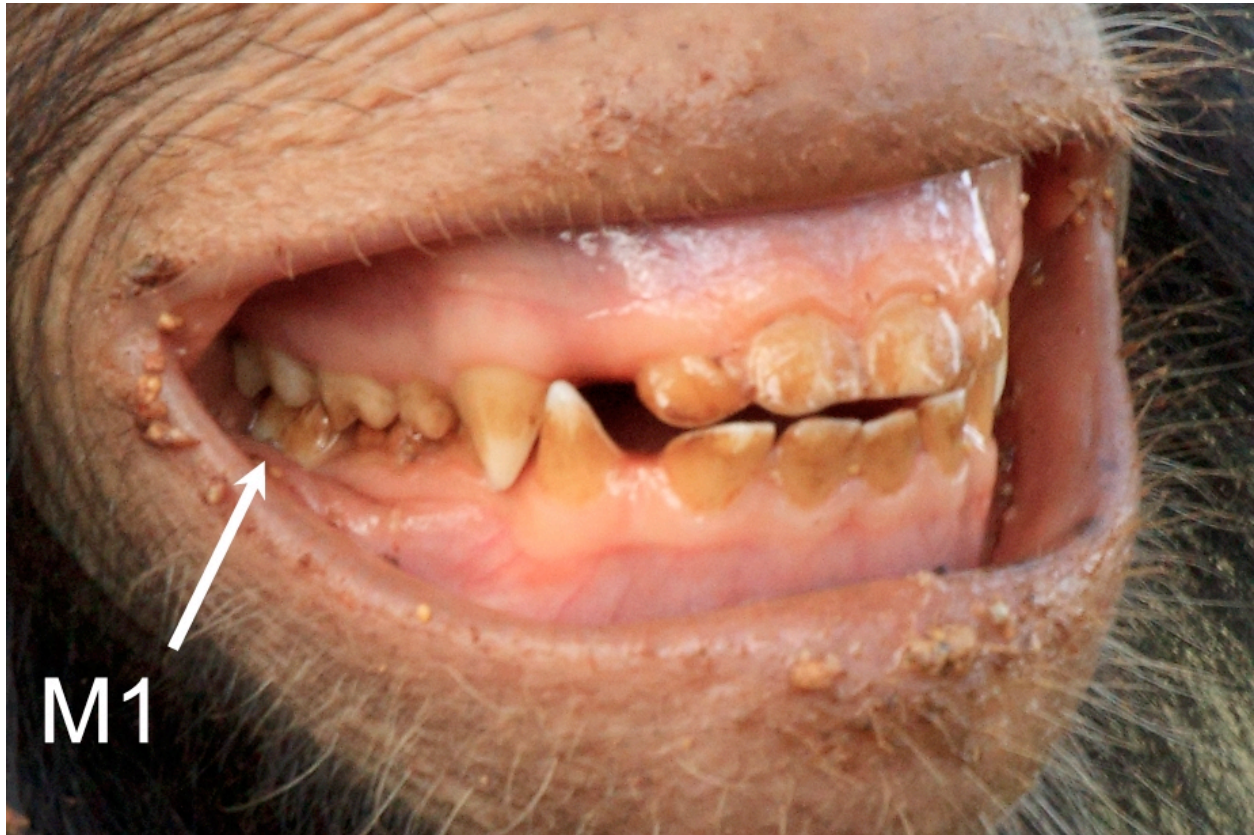

Wenka was last seen suckling at 4.4 years of age.

## Supplementary References

1. Zuckerman S (1928) Age-changes in the chimpanzee, with special reference to the growth of the brain, eruption of teeth, and estimation of age; with a note on the taungs ape. *Proc Zool Soc Lond* 1:1-42.
